# Supplementary material
Source: publisher figshare collection journal article supplement (https://diabetesjournals.figshare.com/ndownloader/files/28870980)
Supplement: Supplementary file 1 [file 28870980]

## **DATA SUPPLEMENT**

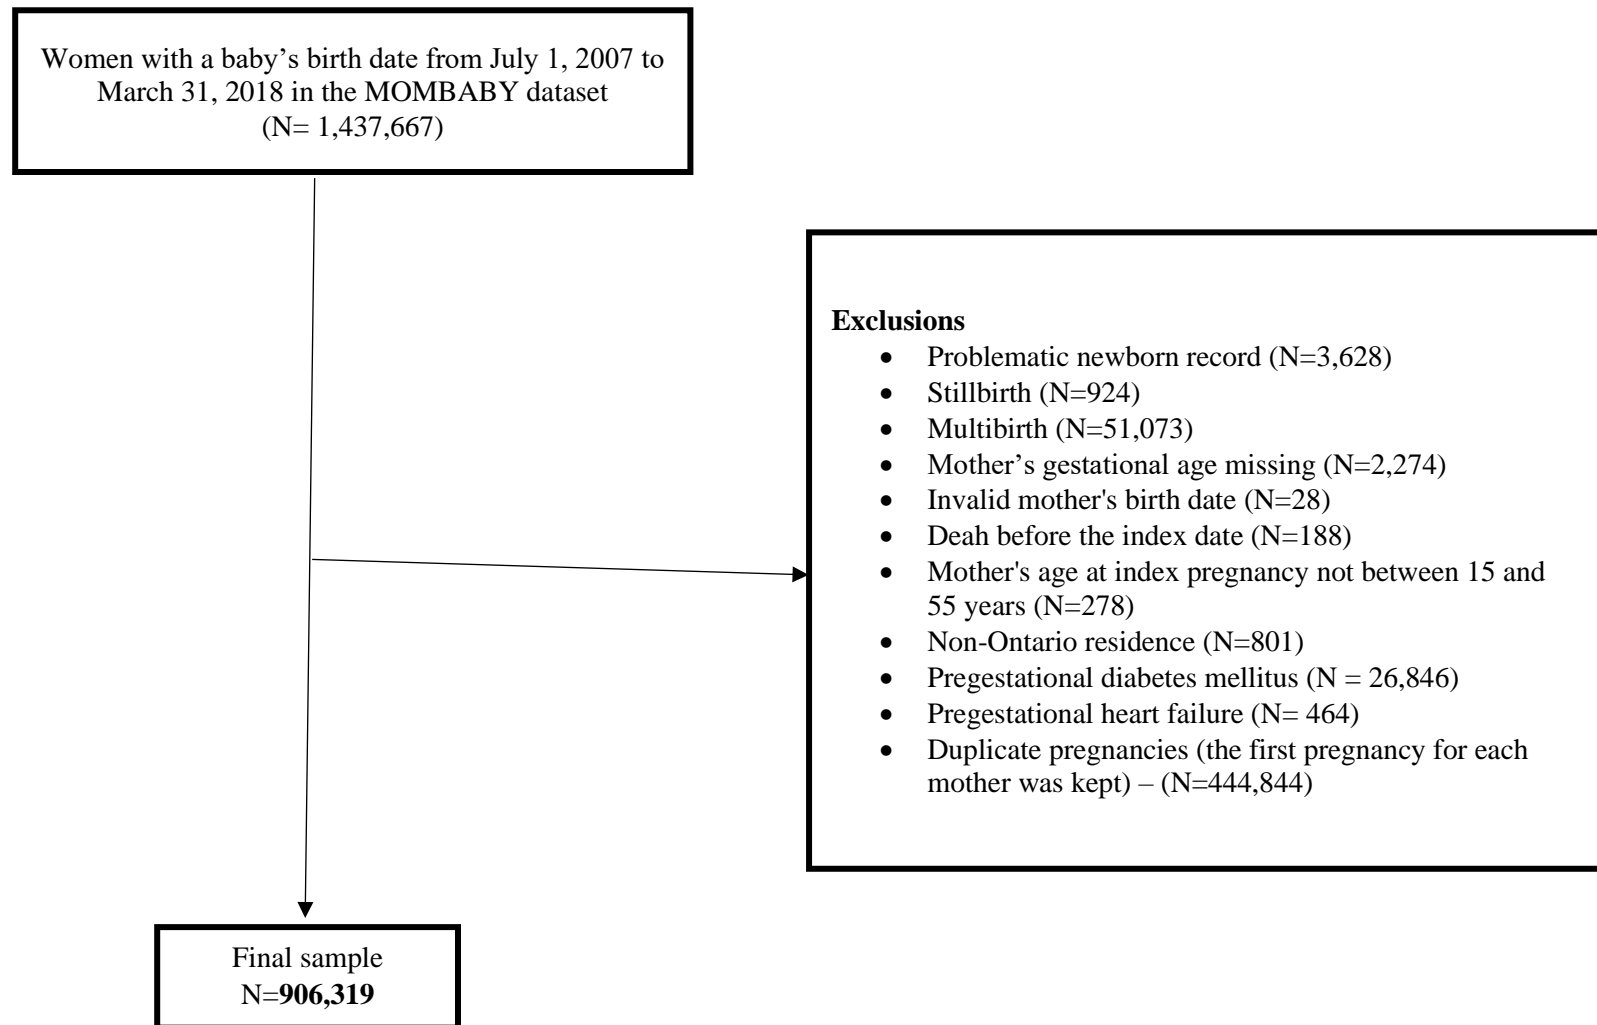

**Supplementary Figure 1. Process of selection of the study participants**

The ICES-derived MOMBABY database contains linked Canadian Institute for Health Information's Discharge Abstract Database (CIHI-DAD) maternal and newborn hospital birth abstracts, as well as unlinked maternal and newborn birth abstracts (henceforth known as orphan birth records).

\*

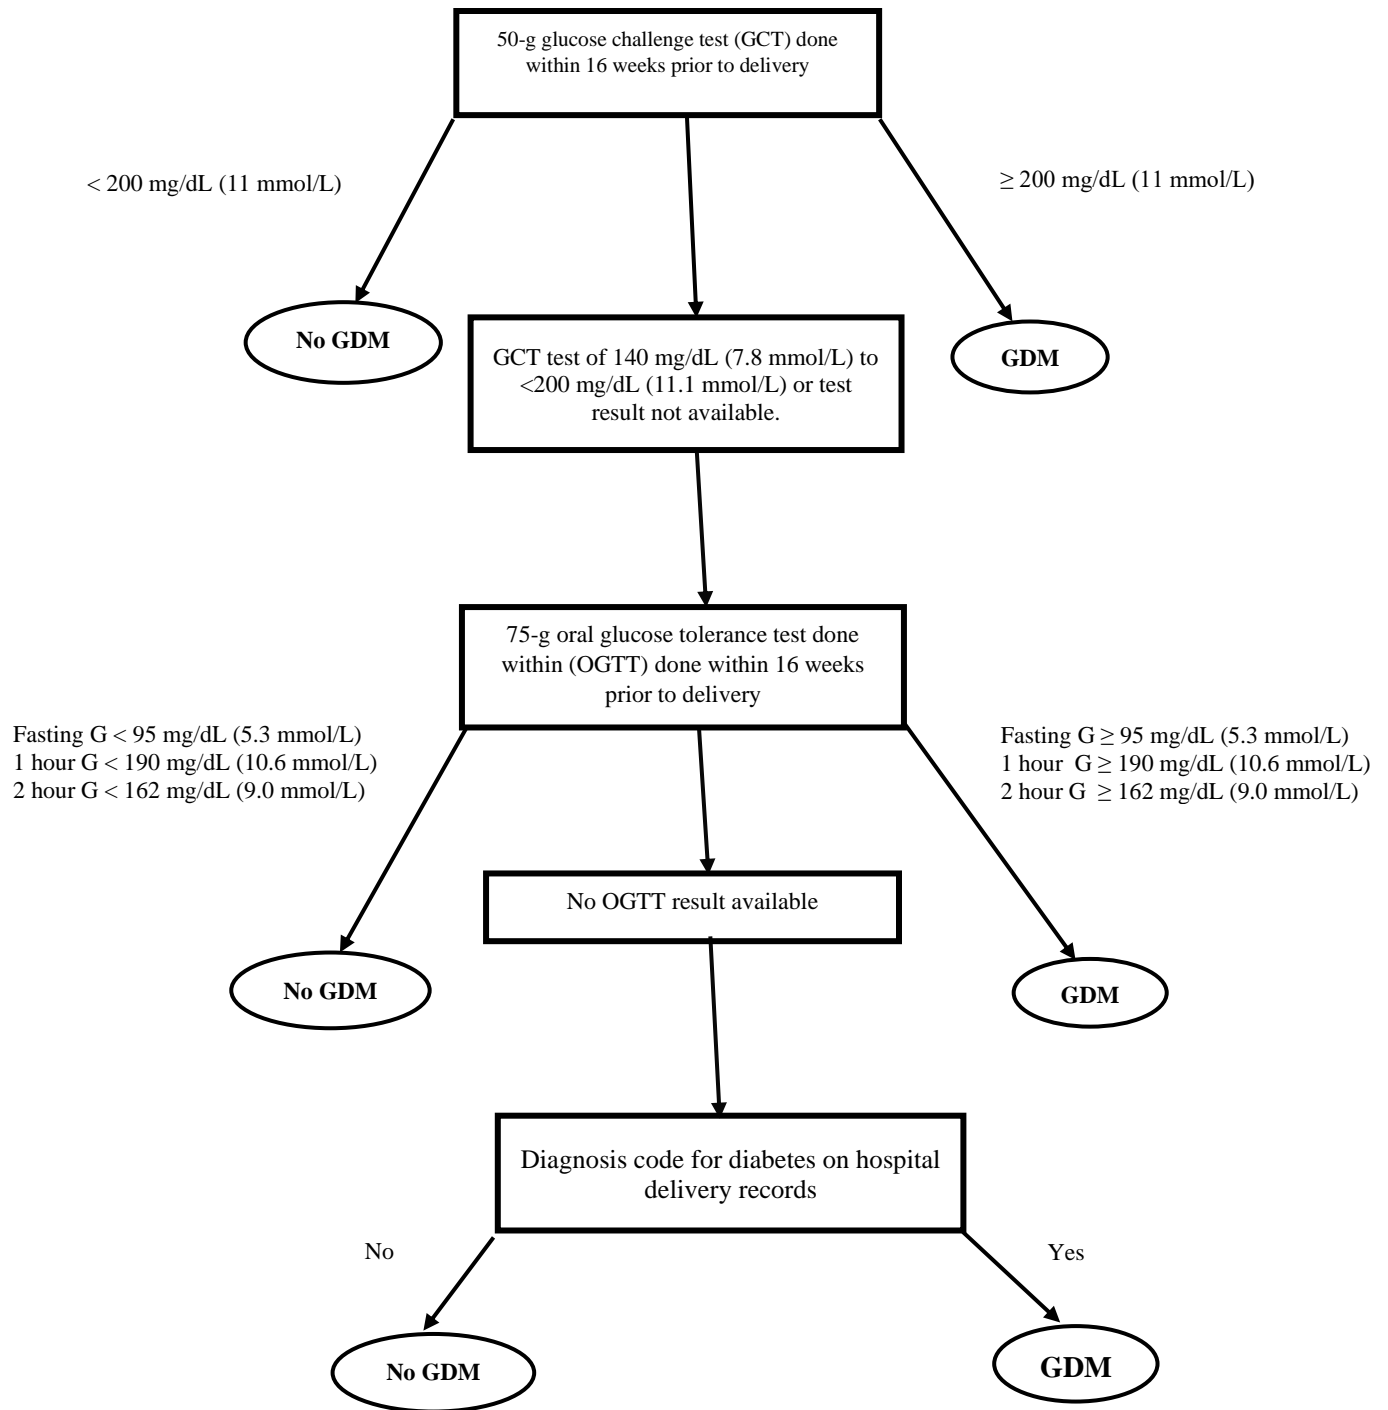

**Supplementary Figure 2: Algorithm for the diagnosis of gestational diabetes**

CGT: Glucose challenge test, G: Glucose, GDM: gestational diabetes, OGTT: oral glucose tolerance test
